# Supplementary material
Source: PubMed Central journal article supplement (PMC7017367)
Supplement: ct9b00890_si_001.pdf [file ct9b00890_si_001.pdf]

# Supporting Information

## Combined Linear Interaction Energy and Alchemical Solvation Free Energy Approach for Protein–binding Affinity Computation

Eko Aditya Rifai,<sup>1</sup> Valerio Ferrario,<sup>2</sup> Jürgen Pleiss,<sup>2</sup> and Daan P. Geerke\*<sup>1</sup>

<sup>1</sup>*AIMMS Division of Molecular and Computational Toxicology, Department of Chemistry and Pharmaceutical Sciences, Vrije Universiteit Amsterdam, De Boelelaan 1108, 1081 HZ Amsterdam, the Netherlands*

<sup>2</sup>*Institute of Biochemistry and Technical Biochemistry, Universität Stuttgart, Allmandring 31, 70569 Stuttgart, Germany*

E-mail: d.p.geerke@vu.nl

Table S1: Weights  $W_i$  of individual simulations (starting from binding pose 1, 2 or 3) as used in the ALIE1 model for the ligands considered (listed by ID).

| <b>ID</b> | Pose 1 | Pose 2 | Pose 3 | <b>ID</b> | Pose 1 | Pose 2 | Pose 3 |
|-----------|--------|--------|--------|-----------|--------|--------|--------|
| <b>1</b>  | 0.002  | 0.998  | -      | <b>15</b> | 0.990  | 0.010  | 0.000  |
| <b>2</b>  | 0.998  | 0.002  | -      | <b>16</b> | 0.740  | 0.260  | -      |
| <b>3</b>  | 0.113  | 0.887  | -      | <b>17</b> | 0.974  | 0.026  | -      |
| <b>4</b>  | 0.003  | 0.988  | 0.010  | <b>18</b> | 0.309  | 0.691  | -      |
| <b>5</b>  | 0.836  | 0.164  | -      | <b>19</b> | 0.063  | 0.933  | 0.004  |
| <b>6</b>  | 0.791  | 0.209  | -      | <b>20</b> | 0.264  | 0.736  | -      |
| <b>7</b>  | 0.971  | 0.029  | -      | <b>21</b> | 0.016  | 0.984  | -      |
| <b>8</b>  | 0.005  | 0.995  | -      | <b>22</b> | 0.996  | 0.004  | -      |
| <b>9</b>  | 0.953  | 0.047  | -      | <b>23</b> | 0.582  | 0.059  | 0.359  |
| <b>10</b> | 0.963  | 0.037  | -      | <b>24</b> | 0.157  | 0.832  | 0.011  |
| <b>11</b> | 0.177  | 0.823  | -      | <b>25</b> | 0.594  | 0.113  | 0.293  |
| <b>12</b> | 0.859  | 0.051  | 0.090  | <b>26</b> | 0.757  | 0.243  | -      |
| <b>13</b> | 0.093  | 0.205  | 0.702  | <b>27</b> | 0.952  | 0.048  | -      |
| <b>14</b> | 0.971  | 0.029  | -      | <b>28</b> | 0.131  | 0.869  | -      |

Table S2: Solvation free energies  $\Delta G_{solv}$  and associated error estimates as calculated for the considered molecules (listed in Table 1).

| <b>No.</b> | $\Delta G_{solv}$ (kJ mol <sup>-1</sup> ) | Error ( $\pm$ ) | <b>No.</b> | $\Delta G_{solv}$ (kJ mol <sup>-1</sup> ) | Error ( $\pm$ ) |
|------------|-------------------------------------------|-----------------|------------|-------------------------------------------|-----------------|
| <b>1</b>   | -34.76                                    | 0.08            | <b>15</b>  | -34.81                                    | 0.08            |
| <b>2</b>   | -40.09                                    | 0.08            | <b>16</b>  | -6.14                                     | 0.07            |
| <b>3</b>   | -15.65                                    | 0.08            | <b>17</b>  | -28.15                                    | 0.08            |
| <b>4</b>   | -37.39                                    | 0.07            | <b>18</b>  | -45.02                                    | 0.08            |
| <b>5</b>   | -47.71                                    | 0.08            | <b>19</b>  | -32.16                                    | 0.09            |
| <b>6</b>   | -45.80                                    | 0.08            | <b>20</b>  | -35.17                                    | 0.08            |
| <b>7</b>   | -15.57                                    | 0.08            | <b>21</b>  | -16.65                                    | 0.08            |
| <b>8</b>   | -30.00                                    | 0.08            | <b>22</b>  | -44.71                                    | 0.09            |
| <b>9</b>   | -25.21                                    | 0.08            | <b>23</b>  | -50.13                                    | 0.11            |
| <b>10</b>  | -34.77                                    | 0.07            | <b>24</b>  | -44.33                                    | 0.09            |
| <b>11</b>  | -50.95                                    | 0.08            | <b>25</b>  | -29.32                                    | 0.08            |
| <b>12</b>  | -24.64                                    | 0.09            | <b>26</b>  | -34.60                                    | 0.08            |
| <b>13</b>  | -39.23                                    | 0.10            | <b>27</b>  | -18.09                                    | 0.07            |
| <b>14</b>  | -16.02                                    | 0.08            | <b>28</b>  | -16.88                                    | 0.07            |

Table S3:  $\langle V_{lig-surr}^{ele} \rangle_{bound}$  and  $\langle V_{lig-surr}^{ele} \rangle_{off}$  values (in kJ mol<sup>-1</sup>) as calculated for the considered molecules (listed in Table 1) and as used in the ALIE2 model

| <b>No.</b> | $\langle V_{lig-surr}^{ele} \rangle_{bound}$ | $\langle V_{lig-surr}^{ele} \rangle_{off}$ | <b>No.</b> | $\langle V_{lig-surr}^{ele} \rangle_{bound}$ | $\langle V_{lig-surr}^{ele} \rangle_{off}$ |
|------------|----------------------------------------------|--------------------------------------------|------------|----------------------------------------------|--------------------------------------------|
| <b>1</b>   | -60.36                                       | 17.32                                      | <b>15</b>  | -59.41                                       | -3.62                                      |
| <b>2</b>   | -57.41                                       | -1.17                                      | <b>16</b>  | -6.93                                        | 3.56                                       |
| <b>3</b>   | -15.04                                       | 13.13                                      | <b>17</b>  | -36.02                                       | 1.48                                       |
| <b>4</b>   | -60.69                                       | 8.81                                       | <b>18</b>  | -42.90                                       | -14.73                                     |
| <b>5</b>   | -51.78                                       | 1.54                                       | <b>19</b>  | -32.40                                       | -12.03                                     |
| <b>6</b>   | -40.51                                       | 0.42                                       | <b>20</b>  | -23.13                                       | 13.81                                      |
| <b>7</b>   | -24.23                                       | 12.90                                      | <b>21</b>  | -6.09                                        | 15.71                                      |
| <b>8</b>   | -53.35                                       | -8.86                                      | <b>22</b>  | -58.96                                       | 29.34                                      |
| <b>9</b>   | -42.68                                       | 0.52                                       | <b>23</b>  | -40.60                                       | 16.14                                      |
| <b>10</b>  | -38.71                                       | 1.77                                       | <b>24</b>  | -38.29                                       | 8.82                                       |
| <b>11</b>  | -52.66                                       | 10.33                                      | <b>25</b>  | -32.90                                       | 9.44                                       |
| <b>12</b>  | -30.91                                       | -3.14                                      | <b>26</b>  | -38.53                                       | -3.18                                      |
| <b>13</b>  | -30.40                                       | 9.81                                       | <b>27</b>  | -26.88                                       | 11.01                                      |
| <b>14</b>  | -5.71                                        | 9.10                                       | <b>28</b>  | -27.57                                       | -8.54                                      |

Table S4: Model parameters for the ALIE1 models of CYP2A6 including some adaptations (i.e., calibrated either without compound **22**, without compound **16**, or with an offset  $\gamma$ -parameter, in  $\text{kJ mol}^{-1}$ ), and for two adapted models with a correction for the ligand’s SASA and number of rotatable bonds (with  $T\Delta S$  in Equation 13 set to  $20 \text{ kJ mol}^{-1}$  or  $6 \text{ kJ mol}^{-1}$ , respectively, as indicated by the subscript for SASA), together with their respective root-mean-square errors (RMSE, with respect to experiment and in  $\text{kJ mol}^{-1}$ ), standard deviation errors in the prediction from leave-one-out cross-validation (SDEP, in  $\text{kJ mol}^{-1}$ ) and correlation metrics for the set of compounds considered in this work.

|                   | ALIE1 | w/o <b>22</b> | w/o <b>16</b> | $\gamma$ | SASA <sub>20</sub> /rot | SASA <sub>6</sub> /rot |
|-------------------|-------|---------------|---------------|----------|-------------------------|------------------------|
| No. of comp.      | 28    | 27            | 27            | 28       | 28                      | 28                     |
| $\alpha$          | 0.34  | 0.30          | 0.34          | 0.15     | 0.26                    | 0.29                   |
| $\beta$           | 0.66  | 0.79          | 0.65          | 0.63     | 0.66                    | 0.66                   |
| $\gamma$          | –     | –             | –             | -23.42   | –                       | –                      |
| RMSE              | 8.39  | 7.71          | 8.53          | 8.03     | 8.38                    | 8.62                   |
| SDEP              | 9.29  | 8.31          | 9.53          | 9.45     | 9.26                    | 9.54                   |
| $r^2$             | 0.59  | 0.64          | 0.50          | 0.61     | 0.56                    | 0.54                   |
| $q^2$             | 0.48  | 0.58          | 0.35          | 0.46     | 0.44                    | 0.41                   |
| Pearson’s r       | 0.77  | 0.80          | 0.71          | 0.78     | 0.75                    | 0.74                   |
| Spearman’s $\rho$ | 0.76  | 0.76          | 0.73          | 0.78     | 0.74                    | 0.74                   |

Table S5: Experimental estimates for the CYP2E1 binding free energy ( $\Delta G_{bind,exp}$  in kJ mol<sup>-1</sup>) of the 28 compounds considered in the current work.

| <b>No.</b> | $\Delta G_{bind,exp}$ | <b>No.</b> | $\Delta G_{bind,exp}$ |
|------------|-----------------------|------------|-----------------------|
| <b>1</b>   | -27.04                | <b>15</b>  | -22.63                |
| <b>2</b>   | -23.40                | <b>16</b>  | -28.86                |
| <b>3</b>   | -31.41                | <b>17</b>  | -28.88                |
| <b>4</b>   | -28.66                | <b>18</b>  | -30.42                |
| <b>5</b>   | -25.39                | <b>19</b>  | -35.82                |
| <b>6</b>   | -32.81                | <b>20</b>  | -26.12                |
| <b>7</b>   | -21.50                | <b>21</b>  | -21.50                |
| <b>8</b>   | -35.10                | <b>22</b>  | -32.68                |
| <b>9</b>   | -42.59                | <b>23</b>  | -37.63                |
| <b>10</b>  | -24.54                | <b>24</b>  | -25.32                |
| <b>11</b>  | -28.17                | <b>25</b>  | -27.68                |
| <b>12</b>  | -35.10                | <b>26</b>  | -27.43                |
| <b>13</b>  | -38.56                | <b>27</b>  | -31.34                |
| <b>14</b>  | -31.71                | <b>28</b>  | -32.74                |

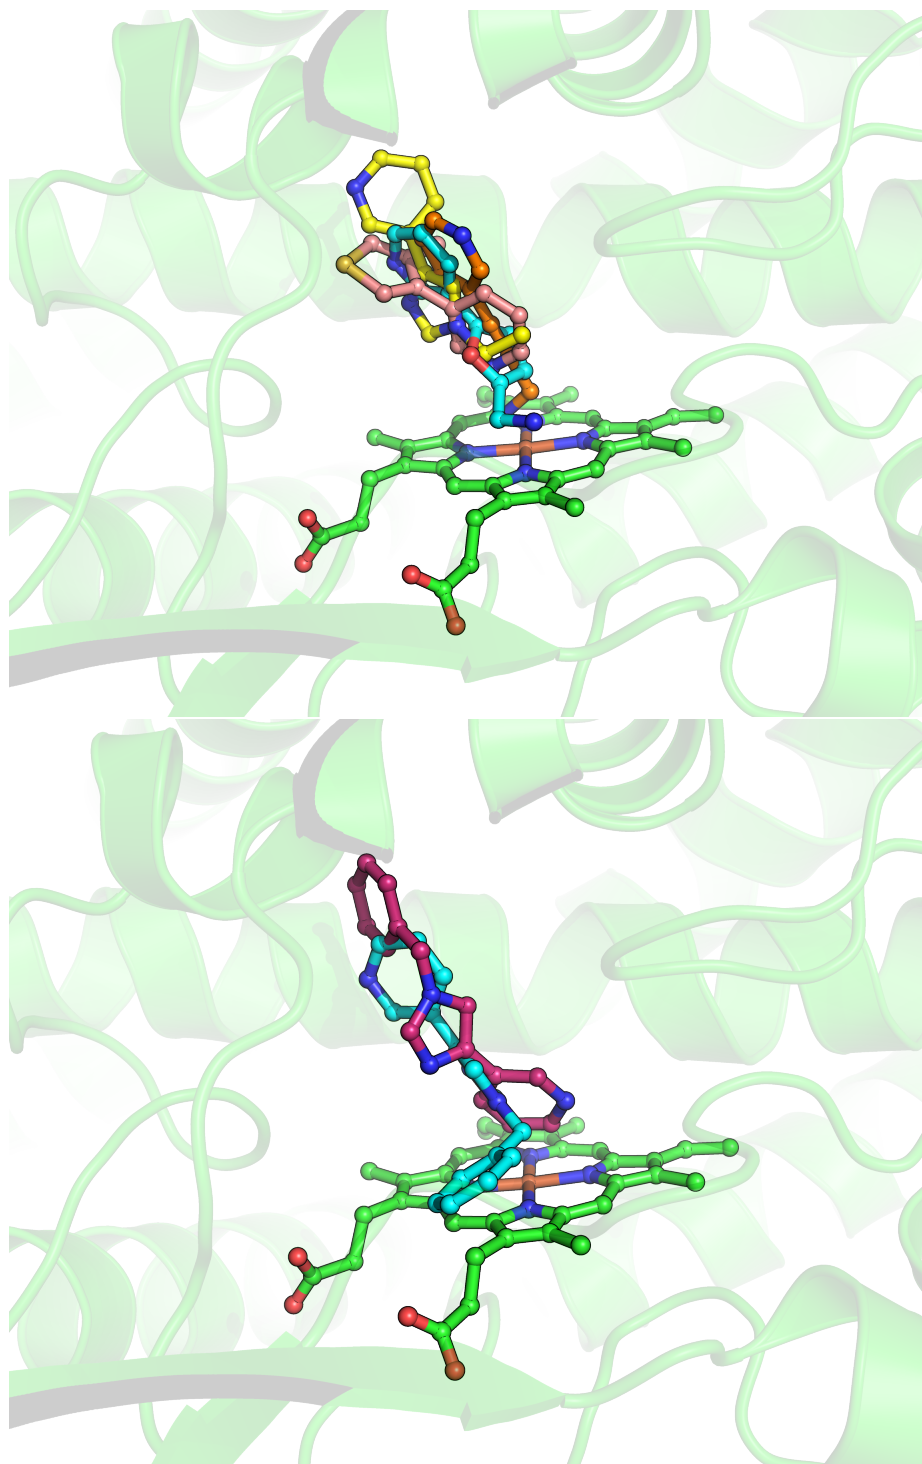

Figure S1: Upper panel: comparison of selected ligand-binding poses (for compounds **2** [cyan], **4** [orange], **14** [pink] and **24** [yellow]) that served as starting pose in MD simulations with  $W_i > 0.8$  as used in the ALIE1 model. Lower panel: comparison of starting poses of individual simulations used in the ALIE1 model for compound **23**, i.e., poses 1 [cyan] and 3 [magenta] (with  $W_i$  of 0.58 and 0.36, respectively, Table S1).

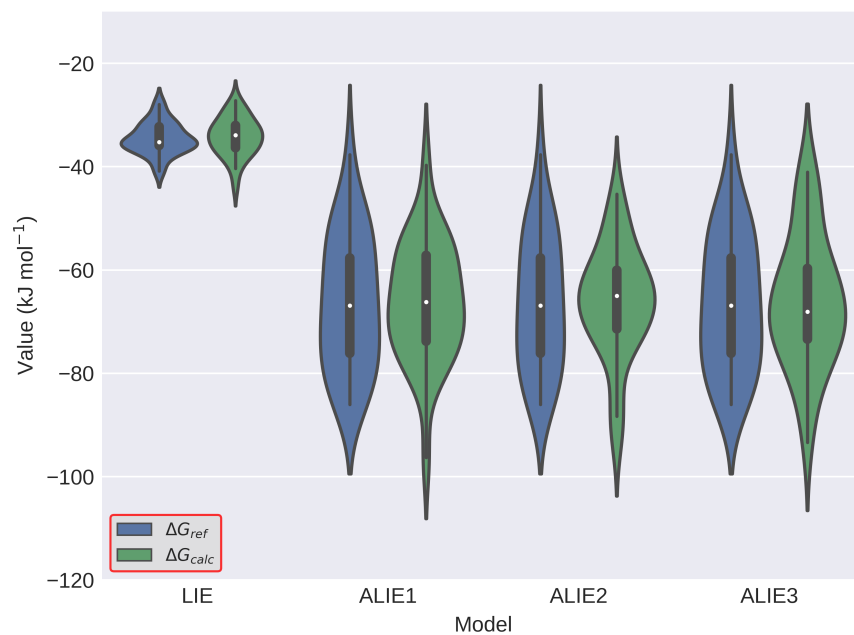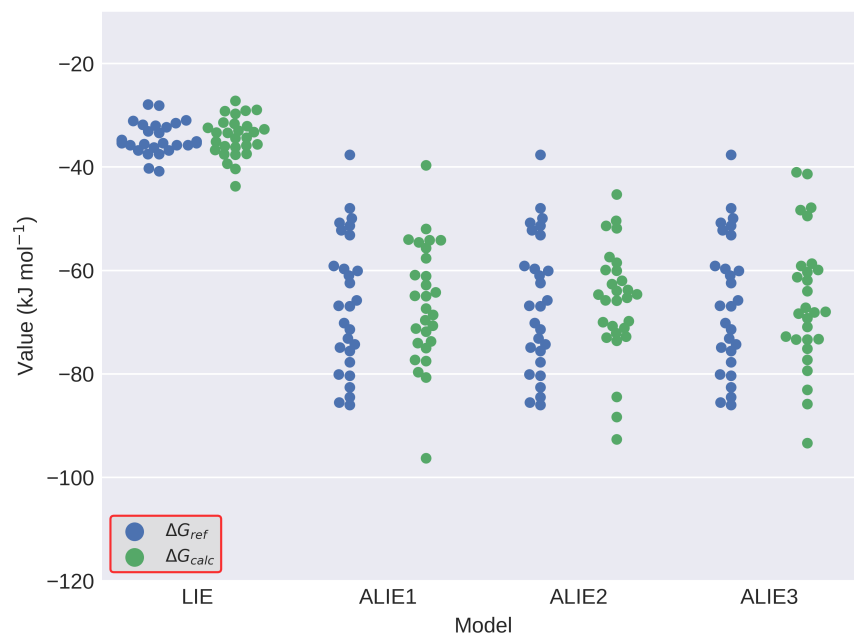

Figure S2: Comparison of distributions of the calculated (calc) and experimental (ref)  $\Delta G_{bind}$  values for the CYP2A6 LIE model, and of the calculated (calc) and reference (ref)  $\Delta G_{prot}$  values for the CYP2A6 ALIE models.



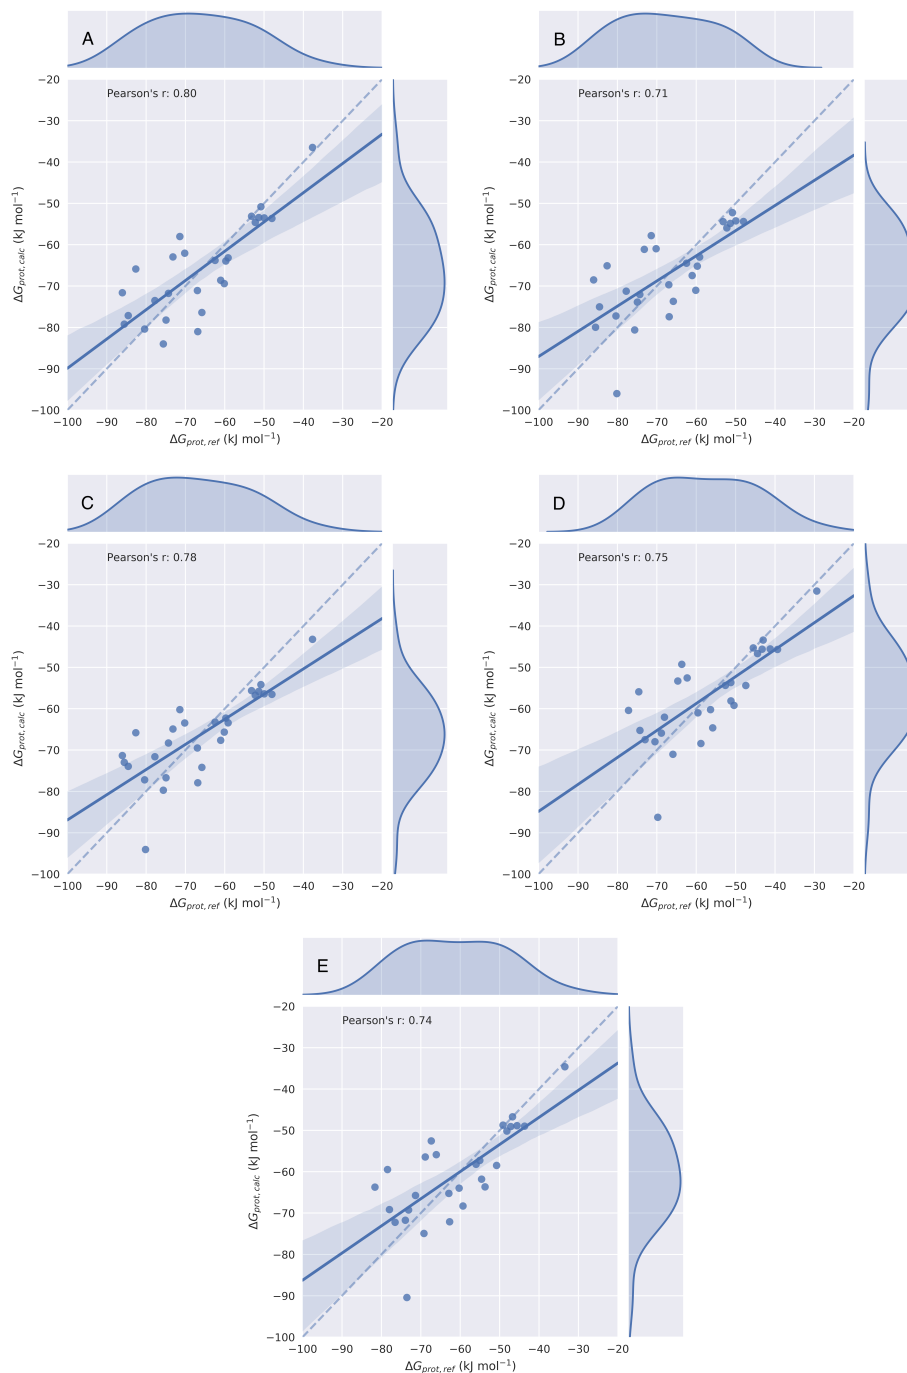

Figure S3: Scatter and kernel density plots of the ALIE1 models for CYP2A6 binding free energy calculation, calibrated either without compound **22** (A), without compound **16** (B), with all 28 compounds and an offset  $\gamma$ -parameter (C), and with a correction for the ligand's SASA and number of rotatable bonds (with  $T\Delta S$  in Equation 13 set to 20 (D) or 6 (E)  $\text{kJ mol}^{-1}$ ), illustrating obtained correlations between calculated free energies  $\Delta G_{prot,calc}$  and the respective reference values. Dashed lines indicate ideal correlation, solid lines indicate actually obtained correlations, and shaded areas indicate 95% confidence intervals.

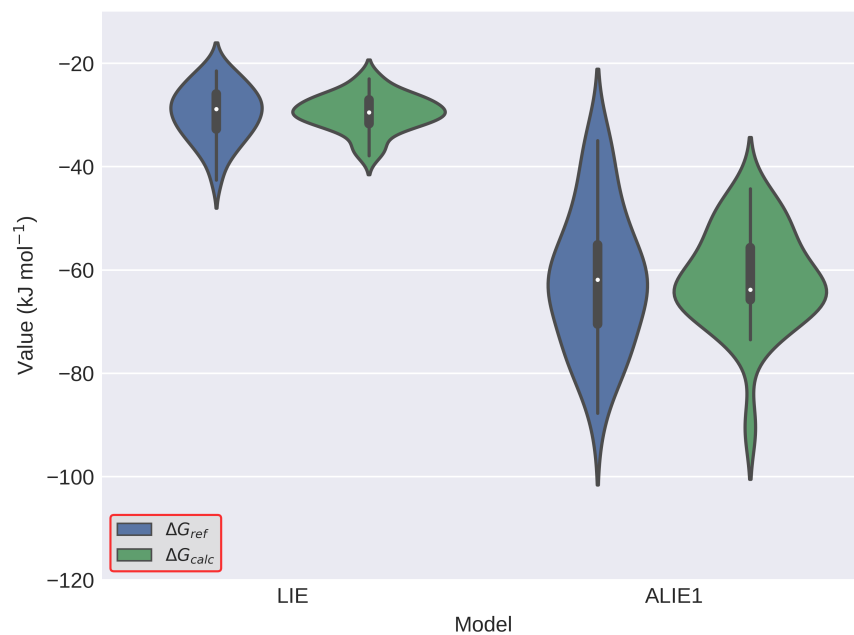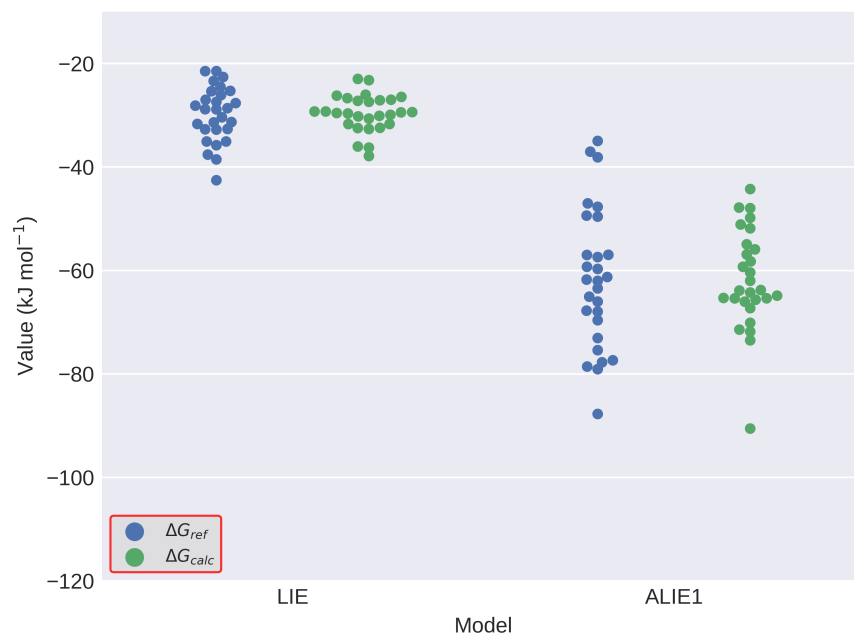

Figure S4: Comparison of distributions of the calculated (calc) and experimental (ref)  $\Delta G_{bind}$  values for the CYP2E1 LIE model, and of the calculated (calc) and reference (ref)  $\Delta G_{prot}$  values for the CYP2E1 ALIE1 model.
